# Supplementary material
Source: publisher figshare collection journal article supplement (https://acs.figshare.com/ndownloader/files/4449427)
Supplement: Supplementary file 1 [file 4449427]

## Supporting Information

### Array-based analysis of secreted glycoproteins for rapid selection of a single cell producing a glycoprotein with desired glycosylation

Sunyoung Park<sup>1</sup>, Wanjung Kim<sup>1</sup>, Yongtae Kim<sup>2</sup>, Young Dok Son<sup>1</sup>, Sang-Chul Lee<sup>1</sup>,  
Eunkyung Kim<sup>1</sup>, Sung Ho Kim<sup>2</sup>, Jung Hoe Kim<sup>1</sup>, Hak-Sung Kim<sup>1\*</sup>

<sup>1</sup>Department of Biological Sciences, <sup>2</sup>Department of Mathematical Sciences,  
Korea Advanced Institute of Science and Technology  
373-1, Guseong-dong, Yuseong-gu, Daejeon 305-701, Korea

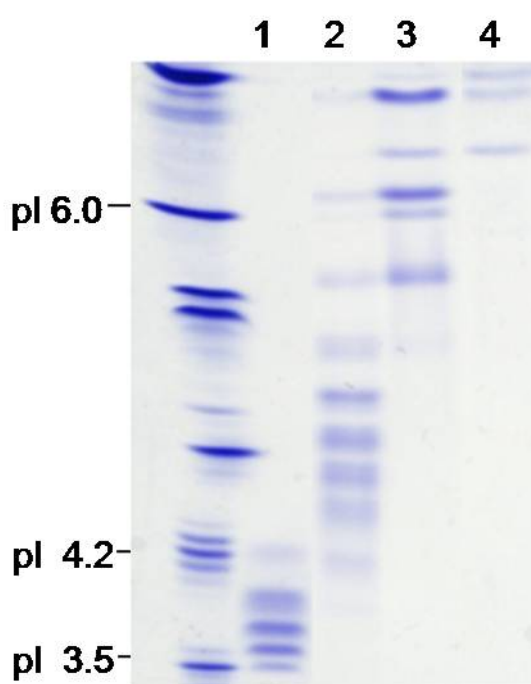

**Figure S-1.** IEF-gel (pH 3-7) image of rhEPO isoforms produced by treatment of standard rhEPO with sialidase for different times (0, 2, 5, or 10 min). Lane 1, isoform-1; Lane 2, isoform-2; Lane 3, isoform-3; Lane 4, isoform-4.

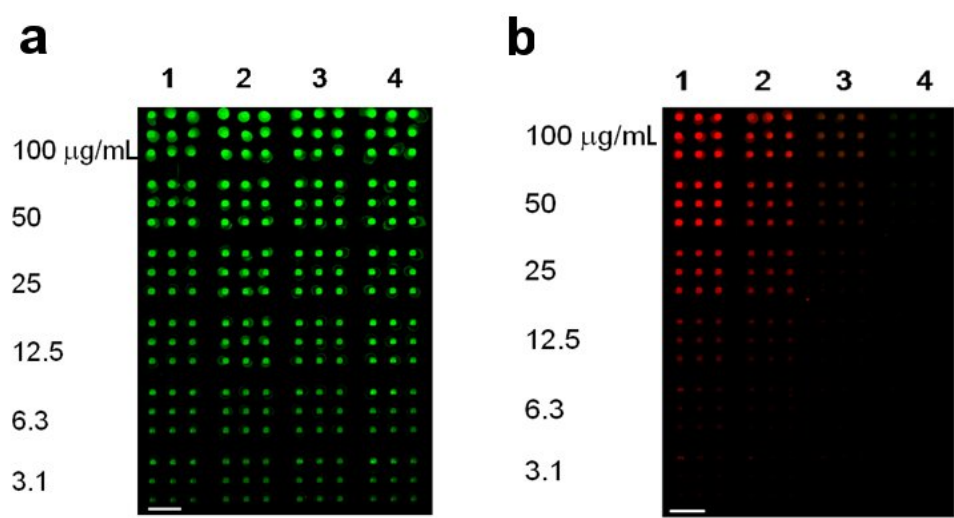

**Figure S-2.** Fluorescence images of the spots probed by Cy3- $\alpha$ -EPO and Cy5-MAA. The rhEPO isoforms were serially diluted and spotted on the glass slide in nine spots with a  $3 \times 3$  format using a robotic microarrayer, followed by probing with either Cy3- $\alpha$ -EPO or Cy5-MAA. Lane 1, isoform-1; Lane 2, isoform-2; Lane 3, isoform-3; Lane 4, isoform-4. The protein concentrations in spotting solution are marked on the left. Scale bars, 300  $\mu\text{m}$ . (a) Fluorescence image of the spots probed by Cy3- $\alpha$ -EPO. (b) Fluorescence image of the spots probed by Cy5-MAA.

**a**

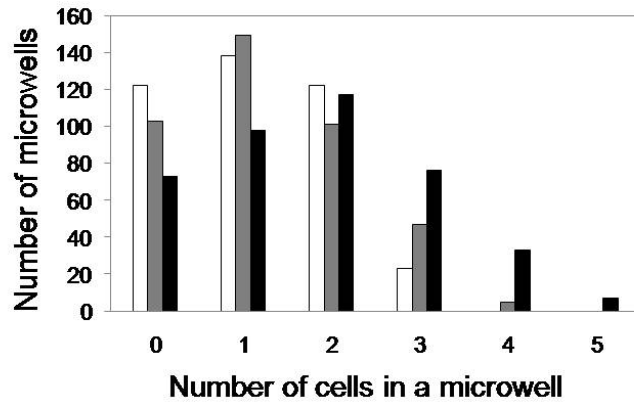

**b**

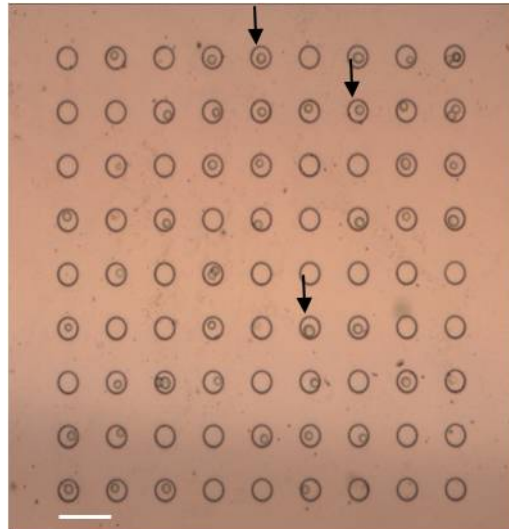

**Figure S-3.** (a) Distribution in the number of microwells with respect to the number of confined cell in a microwell with different size in diameter. A microwell array with different size in diameter was used for each experiment. White bar, 25  $\mu\text{m}$  ; gray bar, 30  $\mu\text{m}$  ; black bar, 40  $\mu\text{m}$ . (b) Phase-contrast image of the microwells with size of 30  $\mu\text{m}$  in diameter. Cell-containing microwells are typically marked with the arrows. Scale bar, 100  $\mu\text{m}$ .

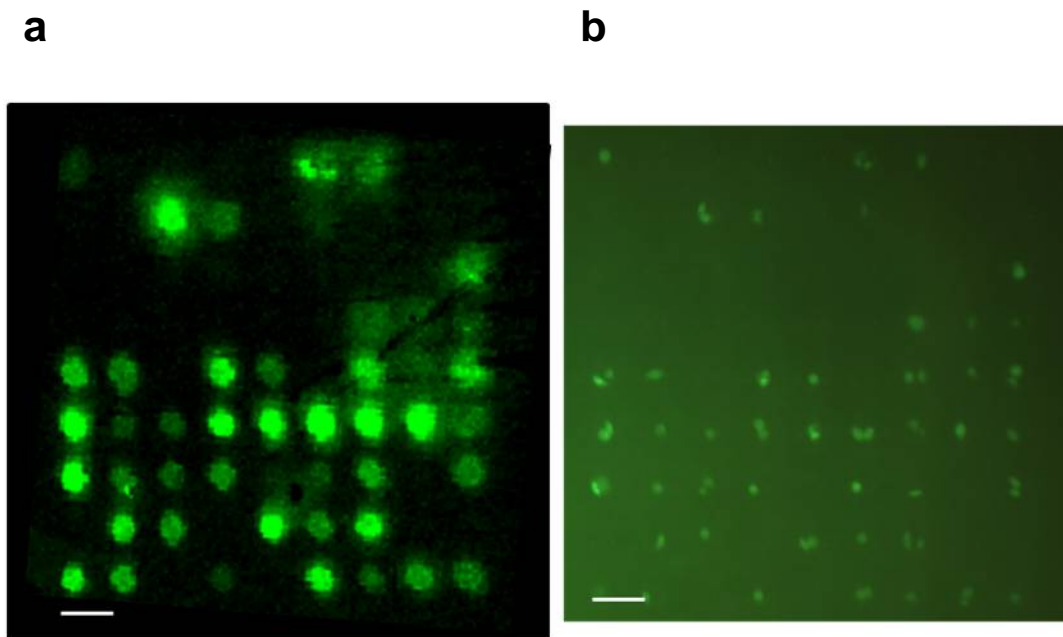

**Figure S-4.** Viability of cells in microwells. **(a)** Fluorescence image of the spots emitting the Cy3- $\alpha$ -EPO signals in a glass slide. **(b)** Image of calcein AM dye signals from the microwells containing live cells. Ubiquitous intracellular esterase of live cells converts non-fluorescent calcein AM dye to fluorescent calcein. Scale bars, 100  $\mu$ m.
